# Supplementary material for: Identification and characterization of the first pectin methylesterase gene discovered in the root lesion nematode Pratylenchus penetrans
Source: PubMed Central journal article supplement (PMC6386239; doi:10.1371/journal.pone.0212540), 2019-02-22
Supplement: pone.0212540.s007.pdf [file pone.0212540.s007.pdf]

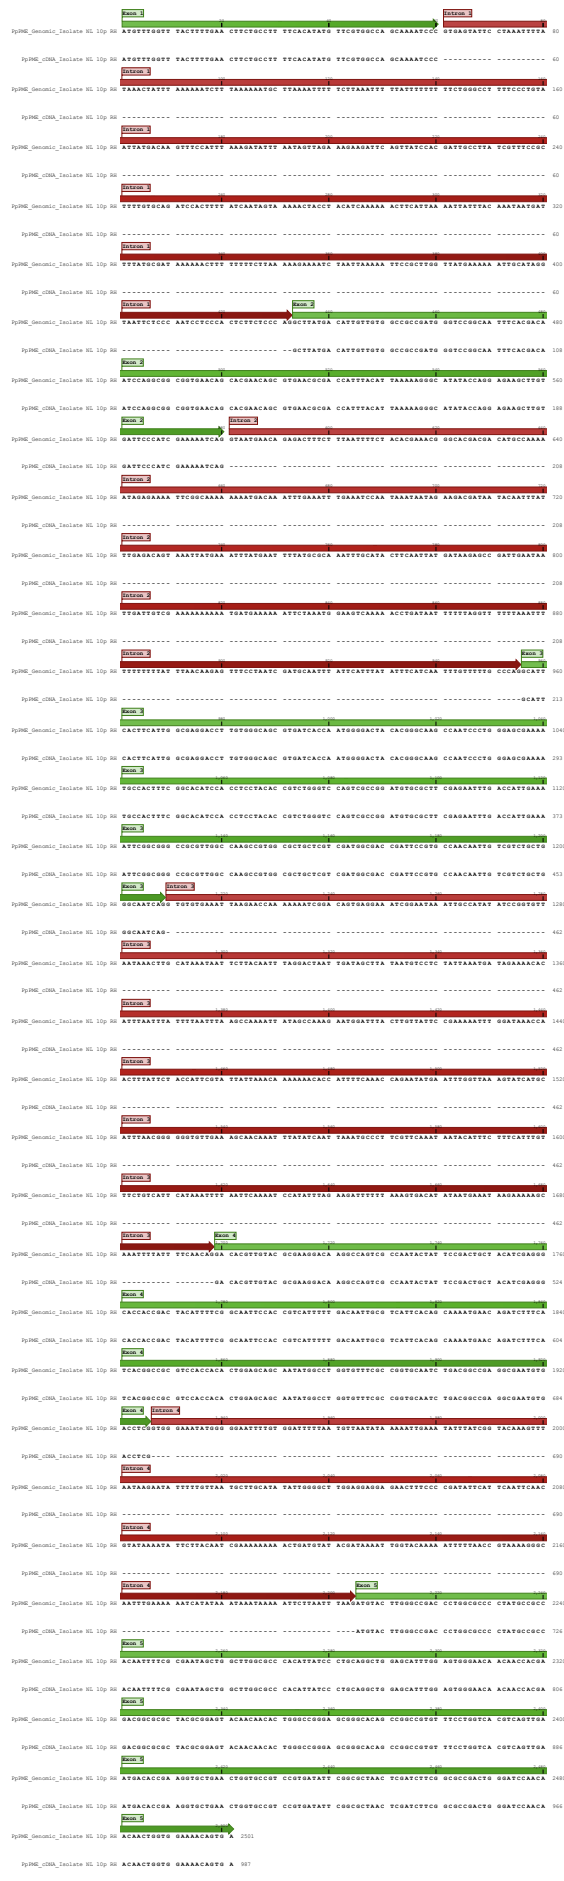

**S1 Fig. Alignment of genomic DNA and cDNA *Pp-pme* sequences of *Pratylenchus penetrans* isolate NL10p RH. Exons and introns are indicated by green and red arrows, respectively.**
